# Supplementary material
Source: Royal Society of Chemistry journal article supplement (doi:10.1039/d6cc01205a)
Supplement: d6cc01205a1.pdf [file d6cc01205a1.pdf]

1 **Supplementary Information**

2 **Interfacial perfluorosulfonic acid ionomer stabilizing sputtered Bi**  
3 **catalyst for highly selective and scalable CO<sub>2</sub>-to-formate**  
4 **electroreduction**

5 Chuyao Jin<sup>1</sup>, Taoning Lei<sup>1</sup>, Shaorui Zhang<sup>2</sup>, Li Xu<sup>1</sup>, Chen Yu<sup>1</sup>, Na Li<sup>3</sup>, Saisai Lin<sup>1</sup>,  
6 Tao Wang<sup>1</sup>, Jingjie Wang<sup>2</sup>, Chenghang Zheng<sup>1,3,4</sup>, Xiao Zhang<sup>1,3,4,\*</sup>, Xiang Gao<sup>1,\*</sup>

7

8 <sup>1</sup>State Key Laboratory of Clean Energy Utilization, Zhejiang University, Hangzhou,  
9 310027, China

10 <sup>2</sup>Harbin Boiler Co., Ltd., Harbin, 150046, China

11 <sup>3</sup>Zhejiang Baima Lake Laboratory Co., Ltd, Hangzhou, 310051, Zhejiang, China

12 <sup>4</sup>Jiaxing Research Institute, Zhejiang Key Laboratory of Clean Energy Conversion and  
13 Utilization, Zhejiang University, Jiaxing, 314000, China

14

15

16 \*Email: [xgao1@zju.edu.cn](mailto:xgao1@zju.edu.cn) (X.Gao); [zhangx\\_energy@zju.edu.cn](mailto:zhangx_energy@zju.edu.cn) (X.Zhang)

17

## 18 **1 Materials**

19 Bismuth target (Bi,  $\phi 50.8 \times 4$  mm, 99.99%, Hebei JiuYue Advanced Material  
20 Technology Co., Ltd), carbon paper (YLS30T, Siner), potassium chloride (KCl, ACS  
21 reagent, 99.0-100.5%, Sigma-Aldrich), sodium bicarbonate ( $\text{NaHCO}_3$ ,  $\geq 99.8\%$ ,  
22 Macklin), potassium bicarbonate ( $\text{KHCO}_3$ , ACS reagent, 99.7%, powder, Sigma-  
23 Aldrich), cesium hydrogen carbonate ( $\text{CsHCO}_3$ , 99.99% trace metals basis, Macklin),  
24 12-crown-4 ( $\text{C}_8\text{H}_{16}\text{O}_4$ ,  $\geq 98\%$ , D&B), 18-crown-6 ( $\text{C}_{12}\text{H}_{24}\text{O}_6$ , battery grade, Suzhou  
25 Duoduo Chemical Technology Co., Ltd.), nitric acid ( $\text{HNO}_3$ , 65-70%, 99.999% metals  
26 basis, Alfa Aesar), potassium hydroxide (KOH, ACS reagent,  $\geq 85\%$ , Sigma-Aldrich),  
27 perfluorosulfonic acid resin solution (Nafion, 5 wt% in a mixture of lower aliphatic  
28 alcohols and water, Macklin) and polytetrafluoroethylene resin (PTFE, 60 wt%,  
29 Aladdin) were used as received without further purification. Ultrapure water with a  
30 resistivity of  $18.2 \text{ M}\Omega \cdot \text{cm}$  (Rephile) was used in the experiments.

## 31 **2 Preparation of Bi@CP, Bi@CP/PFSA and Bi@CP/PTFE electrodes**

32 **Preparation of Bi@CP electrodes.** The Bi@CP electrode was prepared by depositing  
33 a Bi layer onto carbon paper (CP, YLS30T) via magnetron sputtering (JCP350, Beijing  
34 Technol Science Co., Ltd). Prior to deposition, the CP substrate was fixed onto a  
35 rotating holder. The sputtering process was conducted under a base pressure of  $1 \times 10^{-4}$   
36 Pa with an Ar flow rate of 8 sccm using a direct-current power supply. The sputtering  
37 power was set to 20 W, the rotation speed of the sample holder was maintained at 20  
38 rpm, and the deposition time was 40 min. The Bi loading was determined  
39 gravimetrically by weighing the carbon paper substrate before and after magnetron  
40 sputtering. The loading was then calculated from the mass increase divided by the  
41 geometric electrode area. Unless otherwise specified, the electrodes used in the main  
42 text had a Bi loading of  $0.73 \text{ mg cm}^{-2}$ .

43 **Preparation of Bi@CP/PFSA electrodes.** Bi@CP/PFSA electrodes were prepared by  
44 drop-casting PFSA dispersion onto the surface of the Bi@CP electrode. PFSA  
45 dispersions with different mass fractions relative to the sputtered Bi loading (5, 10, 20,  
46 and 30 wt%) were applied and the resulting electrodes were denoted as

47 Bi@CP/PFSA-x, where x represents the PFSA mass percentage. After drop-casting, the  
48 electrodes were dried at 80°C to obtain the PFSA-modified electrodes.

49 **Preparation of Bi@CP/PTFE electrodes.** For comparison, the Bi@CP/PTFE  
50 electrode was fabricated by drop-casting a PTFE dispersion onto the Bi@CP electrode  
51 surface with a PTFE loading of 10 wt% relative to the sputtered Bi mass. The electrode  
52 was subsequently dried at 200 °C to yield the PTFE-modified electrode.

### 53 **3 Materials characterizations**

54 The morphology of the samples was analyzed by scanning electron microscopy (SEM,  
55 Sigma 300, ZEISS). Elemental distribution was examined using X-ray energy  
56 dispersive spectroscopy (EDS, X-max80, Oxford) coupled with the SEM. X-ray  
57 diffraction (XRD, SmartLab SE, Rigaku) was used for phase analysis. The types and  
58 chemical states of elements on the electrode surface were obtained by X-ray  
59 photoelectron spectroscopy (XPS, ESCALAB QXi, Thermo Fisher Scientific). N<sub>2</sub>  
60 adsorption-desorption measurements were conducted using a surface area and pore size  
61 analyzer (BET, ASAP 2460, Micromeritics) to determine the BET surface area and pore  
62 structure of the samples. CO<sub>2</sub> adsorption-desorption measurements were performed at  
63 25 °C using the same adsorption analyzer to evaluate the CO<sub>2</sub> uptake capacity of the  
64 samples. The contact angles were measured using a contact angle measuring device  
65 (CA, Theta Lite, Biolin Scientific AB) at ambient temperature, with the probe liquid  
66 being 3.5 µl of water. All contact angle images were taken 5 s after the application of  
67 the liquid droplet on the surface of the samples. For the quantitative determination of  
68 the amount of Bi detached from the electrode into the electrolyte during CO<sub>2</sub>RR,  
69 inductively coupled plasma optical emission spectroscopy (ICP-OES, Avio 200, Perkin  
70 Elmer) was employed.

### 71 **4 Electrochemical Measurements**

72 All electrochemical measurements were conducted in a flow cell using a standard three-  
73 electrode configuration, with the anode and cathode compartments separated by a  
74 Nafion 117 membrane. Electrochemical measurements were controlled using a  
75 CHI760E and a Princeton VersaSTAT 3F (for impedance and ECSA measurements). 2

76 M KCl solution saturated with CO<sub>2</sub> (pH = 5.8) and 2 M KOH solution were used as the  
77 catholyte and anolyte for electrochemical CO<sub>2</sub> reduction experiments. All potentials  
78 were measured against an Ag/AgCl reference electrode (filled with saturated KCl  
79 solution), and converted to a reversible hydrogen electrode (RHE) scale using the  
80 formula  $E \text{ (vs. RHE)} = E \text{ (vs. Ag/AgCl)} + 0.197 \text{ V} + 0.0591 \text{ V} \times \text{pH} \text{ (25 } ^\circ\text{C)}$ . The as-  
81 prepared Bi electrode and a graphite rod were used as working electrode and counter  
82 electrode, respectively. Solution resistance ( $R_s$ ) was measured before and after each  
83 experiment to compensate for the electrolyte ohmic losses. Unless otherwise specified,  
84 all short-term flow-cell electrolysis tests were conducted for 30 min at each applied  
85 current density.

86 All the EIS measurements were performed at -0.7 V vs. Ag/AgCl with a frequency  
87 range from  $1 \times 10^6$  Hz to 0.01 Hz and an AC amplitude of 10 mV. The resulting Nyquist  
88 plots were analyzed with Zview, where  $R_s$  and  $R_{ct}$  are the electrolyte resistance and the  
89 charge transfer resistance at the electrode-electrolyte interface.

## 90 **5 Calculations of product Faradaic efficiencies**

91 The gaseous products were detected by an online gas chromatography (GC, 9790Plus,  
92 FULI INSTRUMENTS) equipped with a thermal conductivity detector (TCD) and a  
93 flame ionization detector (FID). Argon (Hangzhou Jingong Materials Co., Ltd.,  
94 99.999%) was used as the GC carrier gas and the GC was calibrated with H<sub>2</sub>, CO, CH<sub>4</sub>,  
95 and C<sub>2</sub>H<sub>4</sub>. The FEs of gaseous products were calculated as:

$$96 \quad FE (\%) = \frac{N \times m \times v \times p \times F}{i \times R \times T} \times 100\%$$

97 where N is the number of electrons transferred per molecule of product (for H<sub>2</sub> and CO,  
98  $N = 2$ ), m is the volume fraction of the gaseous product, v is the CO<sub>2</sub> feed flow rate  
99 (assumed to be equal to the outlet flow rate, at standard conditions), p is the standard  
100 pressure, F is the Faraday's constant, i is the current, R is the ideal gas constant, and T  
101 is the standard temperature.

102 Anionic liquid products were quantified by analyzing the collected catholyte using  
103 an ion chromatography (CIC-D160+, SHINE). Formate is the only product from  
104 CO<sub>2</sub>RR detected by IC. Potassium formate standard solutions were used to obtain the

105 working curve of formate. The  $FE_{\text{formate}}$  was calculated using the following formula:

$$106 \quad FE (\%) = \frac{N \times c \times V \times F}{Q} \times 100\%$$

107 where N is the electron transfer number for product (for formate, N = 2), c is the  
108 measured concentration of formate, V is the volume of catholyte, F is the Faraday's  
109 constant, and Q is the total passed charge during reaction.

110 Nuclear magnetic resonance (NMR, DD2-600, Agilent) spectroscopy was used to  
111 examine the catholyte in the water suppression mode to detect any other CO<sub>2</sub>RR  
112 product in the liquid phase. A known concentration of dimethyl sulfoxide (DMSO) was  
113 used as an internal standard. Only formate and DMSO signals were observed from the  
114 NMR spectra, confirming the feasibility of liquid product quantification with IC.

115

116 **6 Supplementary Figures**

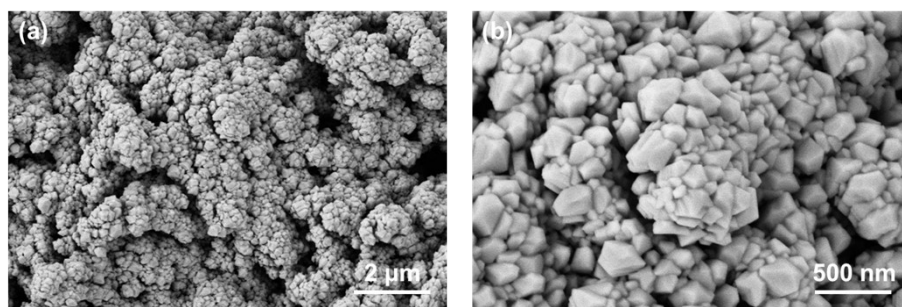

Fig. S1 SEM images of Bi@CP electrode at (a) low and (b) high magnification.

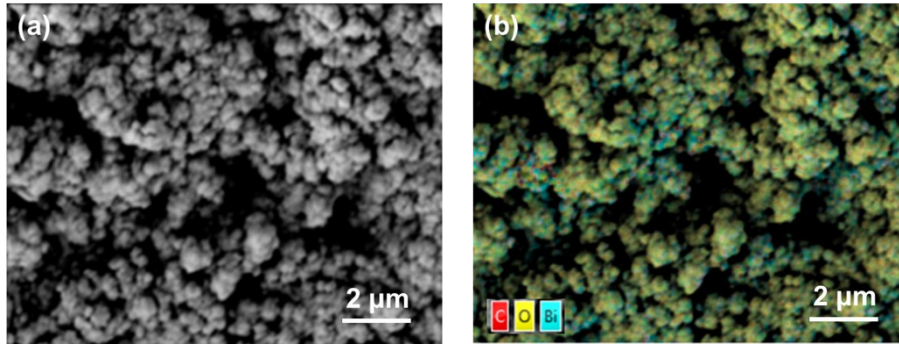

Fig. S2 Elemental mapping of Bi@CP electrode. (a) SEM image of Bi@CP. (b) EDS elemental map of Bi@CP.

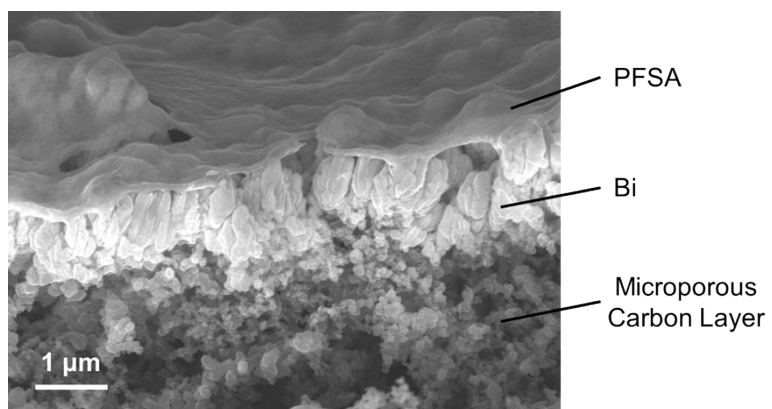

Fig. S3 Cross section SEM image of Bi@CP/PFSA.

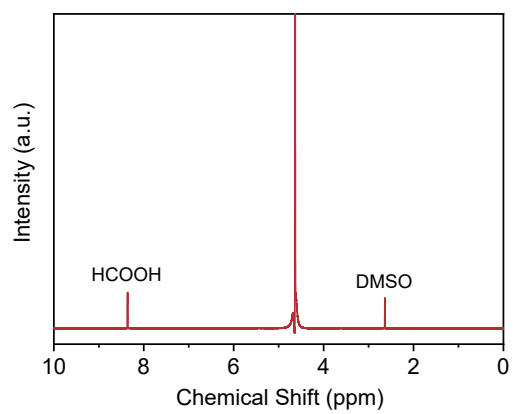

Fig. S4 Representative  $^1\text{H-NMR}$  spectroscopy of catholyte after  $\text{CO}_2\text{RR}$  with Bi catalysts.

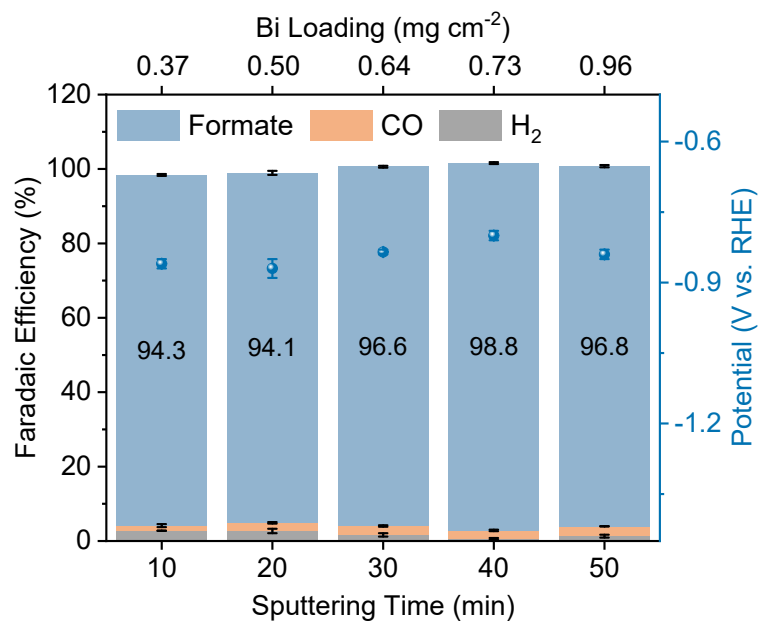

Fig. S5 Product distribution and reaction potential for Bi@CP with different Bi loadings in 2 M KCl solution at  $150 \text{ mA cm}^{-2}$ .

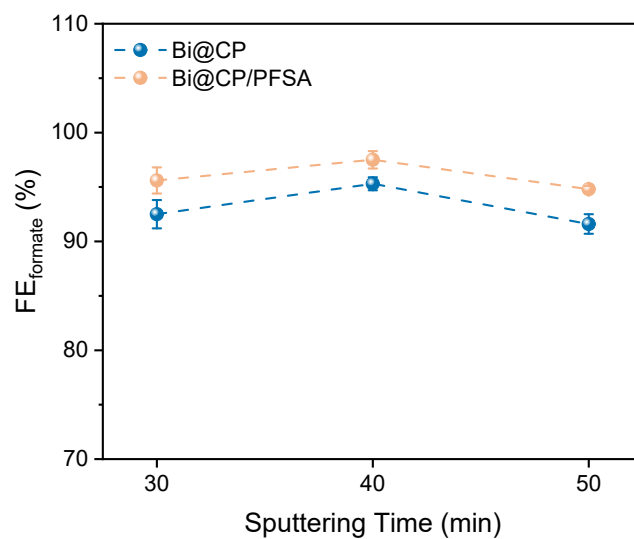

Fig. S6 FE<sub>formate</sub> for Bi@CP and Bi@CP/PFSA with different Bi loadings in 2 M KCl solution at 250 mA cm<sup>-2</sup>.

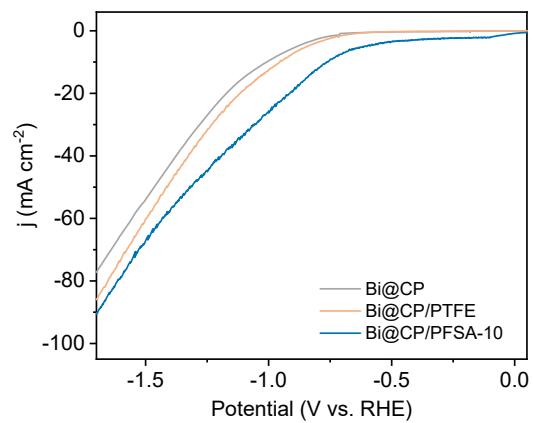

Fig. S7 Linear sweep voltammetry (LSV) comparison of different electrodes.

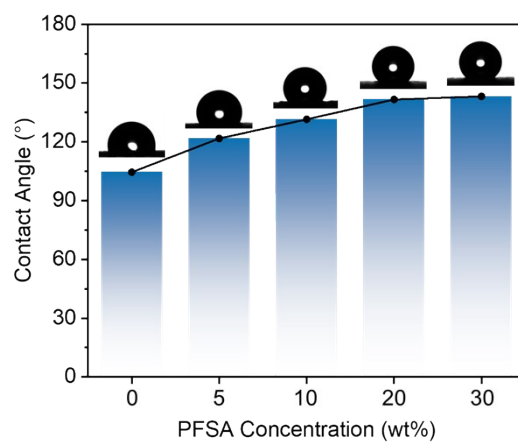

Fig. S8 Water contact angle of (a) Bi@CP, (b) Bi@CP/PFSA-5, (c) Bi@CP/PFSA-10, (d) Bi@CP/PFSA-20 and (e) Bi@CP/PFSA-30.

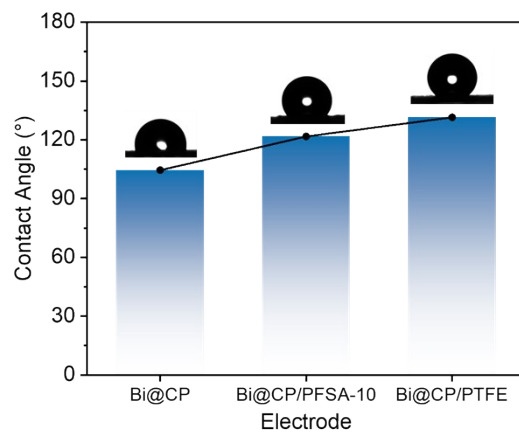

Fig. S9 Water contact angle of (a) Bi@CP, (b) Bi@CP/PFSA-10 and (c) Bi@CP/PTFE.

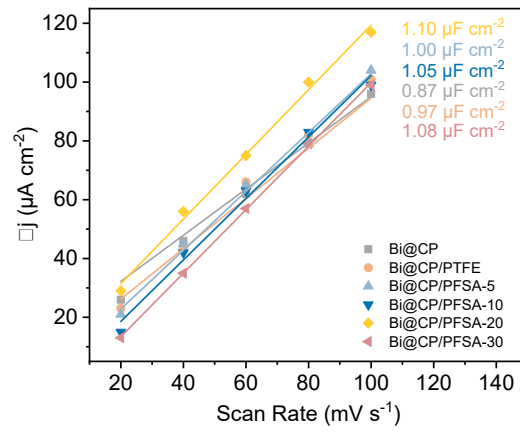

Fig. S10 Electrochemically active surface area (ECSA) comparison of different electrodes.

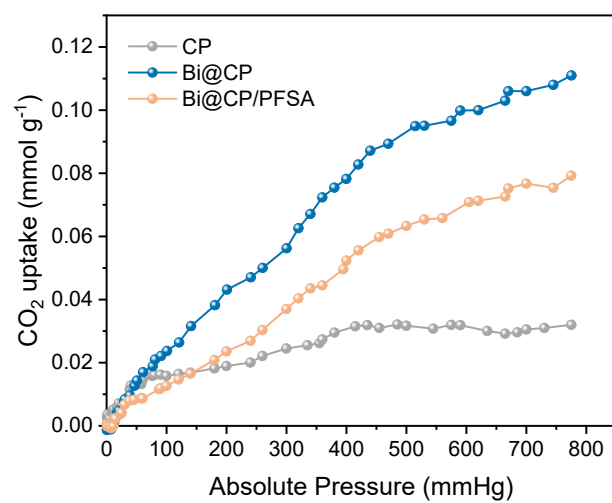

Fig. S11 CO<sub>2</sub> adsorption isotherms of CP, Bi@CP and Bi@CP/PFSA at 25 °C.

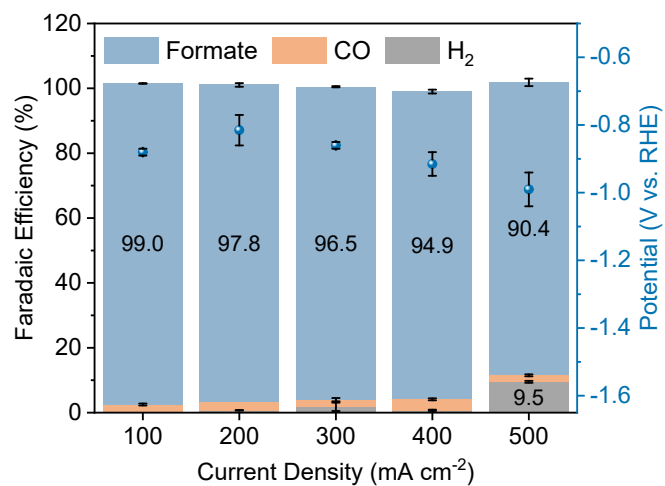

Fig. S12 Product distribution and reaction potential at different current densities for Bi@CP/PFSA-10 in 2 M KCl solution.

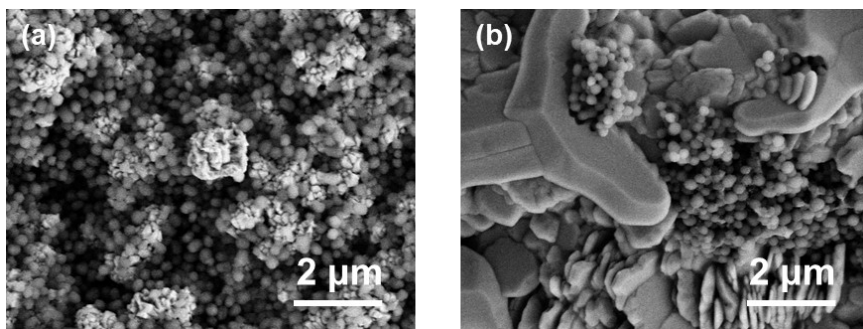

Fig. S13 SEM images of Bi@CP/PTFE (a) before and (b) after CO<sub>2</sub>RR.

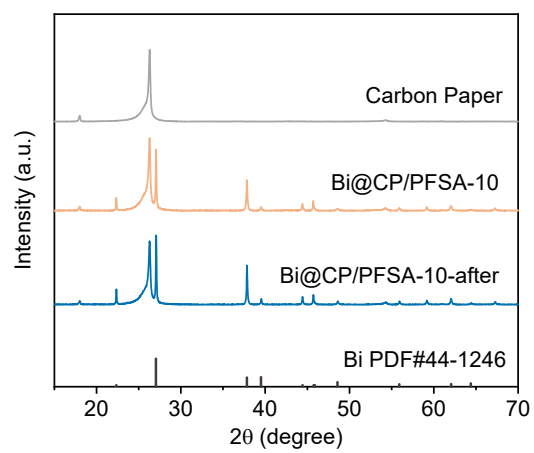

Fig. S14 XRD patterns of Bi@CP/PFSA-10 before and after electrolysis.

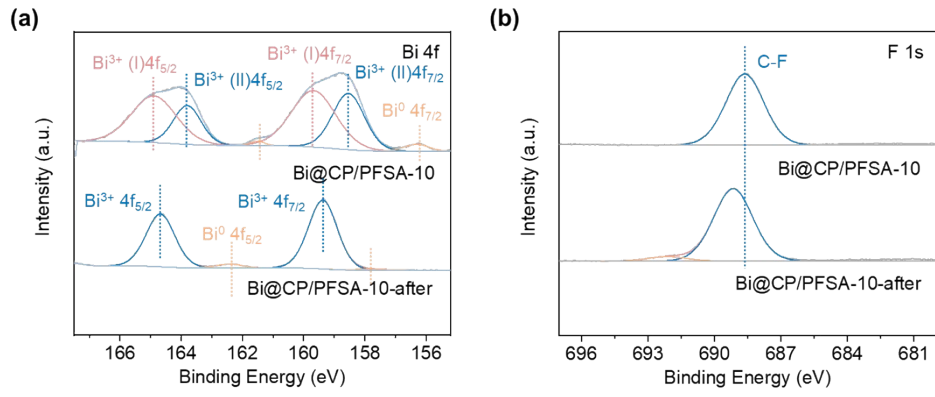

Fig. S15 Surface chemical evolution of Bi@CP/PFSA-10 during early-stage electrolysis. (a) Bi 4f XPS spectra before and after short-term electrolysis. (b) F 1s XPS spectra before and after short-term electrolysis.

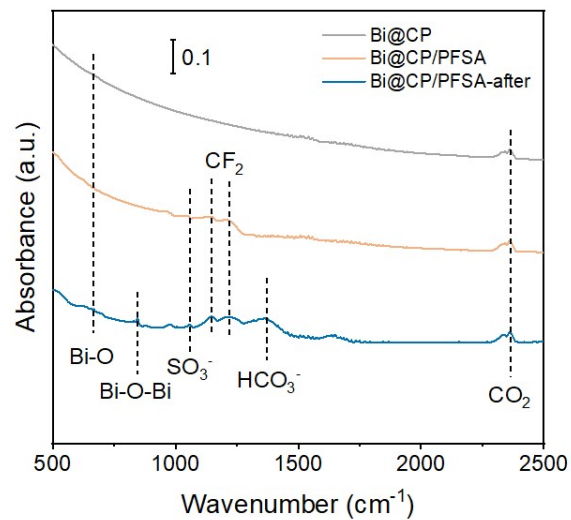

Fig. S16 Ex situ FTIR spectra of Bi@CP, Bi@CP/PFSA, and Bi@CP/PFSA after electrolysis.

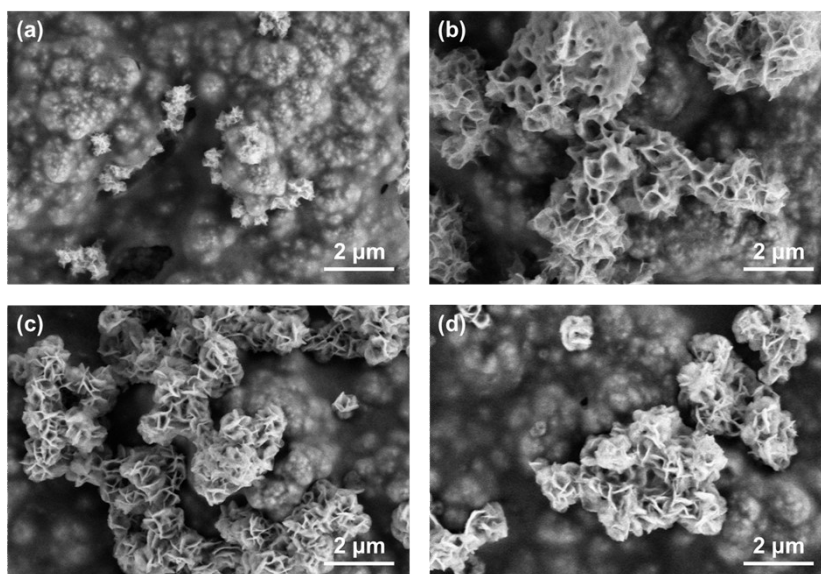

Fig. S17 SEM images of Bi@CP/PFSA-10 after electrolysis at (a)  $100 \text{ mA cm}^{-2}$ , (b)  $200 \text{ mA cm}^{-2}$ , (c)  $300 \text{ mA cm}^{-2}$  and (d)  $400 \text{ mA cm}^{-2}$ .

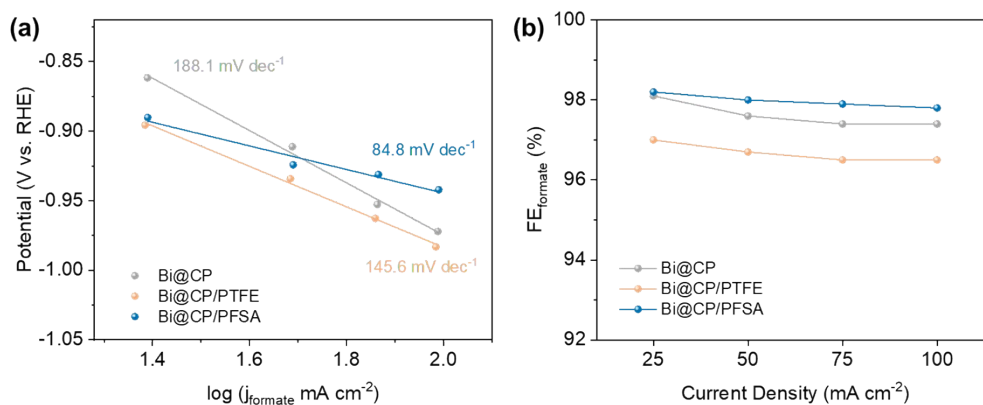

Fig. S18 Tafel analysis of Bi@CP, Bi@CP/PTFE, and Bi@CP/PFSA based on the formate partial current density. (a) Tafel plots constructed from the  $iR$ -corrected cathodic potential vs.  $\log(j_{\text{formate}})$  for Bi@CP, Bi@CP/PTFE, and Bi@CP/PFSA. (b)  $FE_{\text{formate}}$  of Bi@CP, Bi@CP/PTFE, and Bi@CP/PFSA at the current densities used for Tafel analysis.

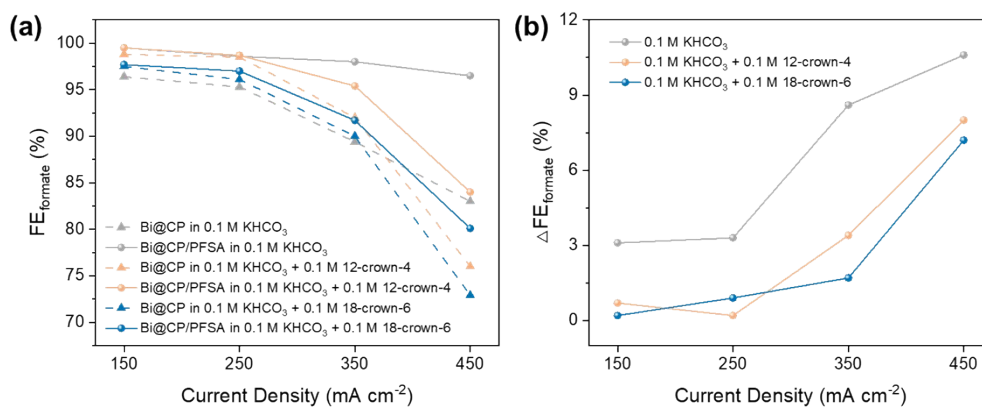

Fig. S19 Crown ether chelation experiments for evaluating the cation-related role of PFSA in  $\text{CO}_2\text{RR}$ . (a)  $FE_{\text{formate}}$  and (b) PFSA-induced increment in  $FE_{\text{formate}}$  ( $\Delta FE_{\text{formate}}$ ) of Bi@CP and Bi@CP/PFSA under different electrolyte conditions at different current densities.

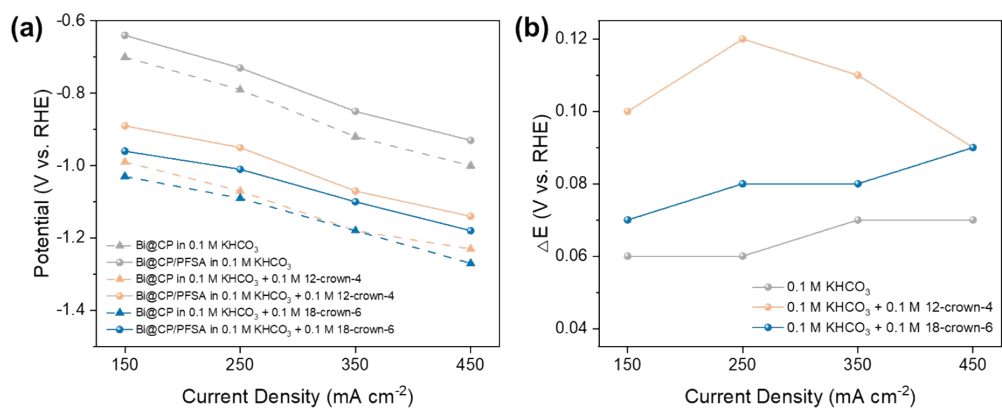

Fig. S20 Cathodic-potential analysis of crown ether chelation experiments for evaluating the cation-related role of PFSA in CO<sub>2</sub>RR. (a) Cathodic potentials and (b) PFSA-induced increment in potential ( $\Delta E$ ) of Bi@CP and Bi@CP/PFSA under different electrolyte conditions at different current densities.

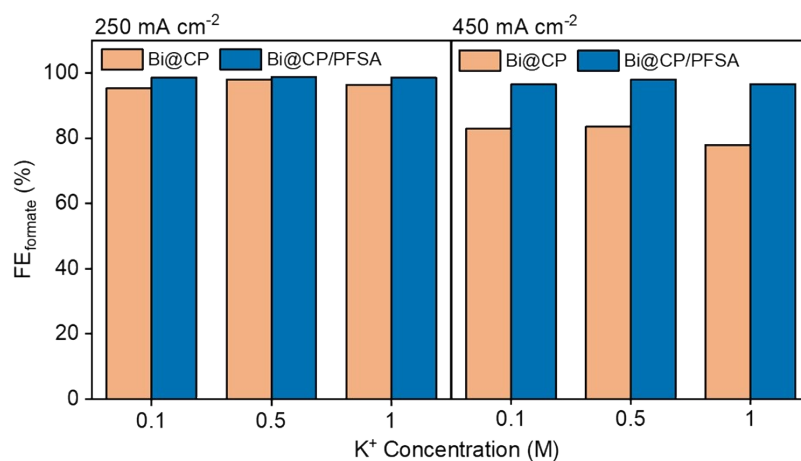

Fig. S21 CO<sub>2</sub>RR performance of Bi@CP and Bi@CP/PFSA in KHCO<sub>3</sub> electrolytes with different K<sup>+</sup> concentrations at different current densities.

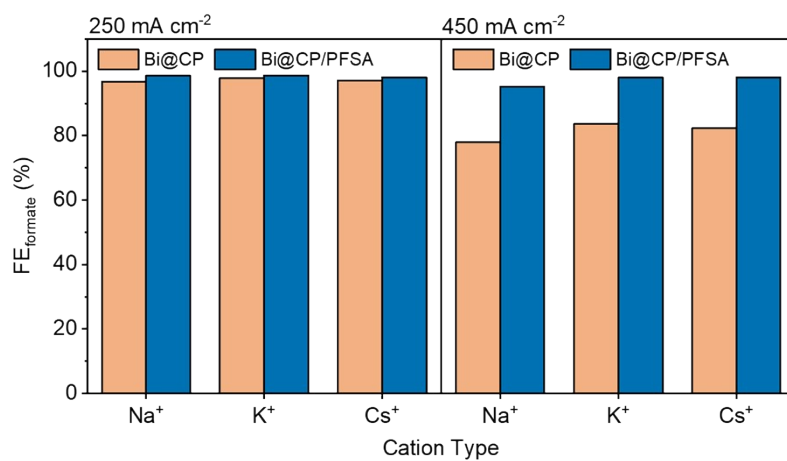

Fig. S22 CO<sub>2</sub>RR performance of Bi@CP and Bi@CP/PFSA in 0.5 M NaHCO<sub>3</sub>, KHCO<sub>3</sub> and CsHCO<sub>3</sub> electrolytes at different current densities.

139 **Table S1**

140 Textural parameters of CP, Bi@CP/PFSA, and Bi@CP derived from N<sub>2</sub> adsorption  
141 measurements.

| Catalyst   | BET surface area (m <sup>2</sup> g <sup>-1</sup> ) | Single-point total pore volume (cm <sup>3</sup> g <sup>-1</sup> ) |
|------------|----------------------------------------------------|-------------------------------------------------------------------|
| CP         | 1.4475                                             | 0.000149                                                          |
| Bi@CP/PFSA | 4.8261                                             | 0.005395                                                          |
| Bi@CP      | 5.5632                                             | 0.006943                                                          |

142

143 **Table S2**

144 CO<sub>2</sub> uptake values at representative pressures for CP, Bi@CP and Bi@CP/PFSA at 25  
145 °C.

| Pressure (mmHg) | CP<br>(mmol g <sup>-1</sup> ) | Bi@CP<br>(mmol g <sup>-1</sup> ) | Bi@CP/PFSA<br>(mmol g <sup>-1</sup> ) |
|-----------------|-------------------------------|----------------------------------|---------------------------------------|
| 50              | 0.0130                        | 0.0141                           | 0.0085                                |
| 100             | 0.0158                        | 0.0236                           | 0.0127                                |
| 200             | 0.0190                        | 0.0430                           | 0.0236                                |
| 400             | 0.0307                        | 0.0783                           | 0.0524                                |
| 760             | 0.0272                        | 0.1087                           | 0.0773                                |

146

147 **Table S3**

148 Summary of formate production from CO<sub>2</sub>RR over various Bi based electrodes in a  
 149 flow cell.

| Number | Catalysts                                              | Electrolyte            | Potential         | FE <sub>formate</sub><br>(%) | Current<br>density<br>(mA cm <sup>-2</sup> ) | Time<br>(h) | Electrode<br>area<br>(cm <sup>2</sup> ) | Ref.         |
|--------|--------------------------------------------------------|------------------------|-------------------|------------------------------|----------------------------------------------|-------------|-----------------------------------------|--------------|
| 1      | Bi@CP/PFSA                                             | 2M KCl                 | -1.0V vs.<br>RHE  | 94.9                         | 400                                          | 0.5         | 1                                       | This<br>work |
| 2      | Bi@CP/PFSA                                             | 2M KCl                 | /                 | 93.0                         | 100                                          | 135         | 25                                      | This<br>work |
| 3      | Bi@CP/PFSA                                             | 2M KCl                 | /                 | 94.0                         | 250                                          | 95          | 25                                      | This<br>work |
| 4      | syn-Bi <sub>2</sub> O <sub>3</sub>                     | 1M KOH                 | -0.7V vs.<br>RHE  | 94.0                         | 100                                          | 28          | 1                                       | 1            |
| 5      | GB-Bi                                                  | 1M KOH                 | -0.5V vs.<br>RHE  | 90.0                         | 100                                          | 122         | 1                                       | 2            |
| 6      | CT/h-BiOBr                                             | 1M KOH                 | -0.9V vs.<br>RHE  | 96.0                         | 165                                          | 18          | 1                                       | 3            |
| 7      | Bi-NC                                                  | 1M KOH                 | -1.0V vs.<br>RHE  | 92.0                         | 100                                          | 45          | 1                                       | 4            |
| 8      | BiFeO <sub>3</sub> /Bi <sub>25</sub> FeO <sub>40</sub> | 1M KOH                 | -0.64V vs.<br>RHE | 95.0                         | 140                                          | 88          | 1                                       | 5            |
| 9      | f-Bi <sub>2</sub> O <sub>3</sub> /CF                   | 0.5M KHCO <sub>3</sub> | -1.1V vs.<br>RHE  | 85.0                         | 180                                          | 20          | 1                                       | 6            |
| 10     | O <sub>V</sub> -Bi                                     | 1M KOH                 | /                 | 93.0                         | 500                                          | /           | 5                                       | 7            |
| 11     | BND-ZIF8                                               | 0.5M KHCO <sub>3</sub> | -1.1V vs.<br>RHE  | 80.0                         | 110                                          | 24          | 1                                       | 8            |
| 12     | Bi <sub>24</sub> O <sub>31</sub> Cl <sub>10</sub>      | 1M KOH                 | -1.2V vs.<br>RHE  | 99.1                         | 600                                          | /           | 1                                       | 9            |
| 13     | Bi <sub>1,n</sub> -pBi <sub>2</sub> O <sub>3-x</sub>   | 0.5M KHCO <sub>3</sub> | -1.0V vs.<br>RHE  | 90.0                         | 20                                           | 150         | 1                                       | 10           |

151 **Table S4**

152 Concentrations of dissolved Bi in the electrolytes after CO<sub>2</sub>RR measured by ICP-OES.

| Catalyst      | Concentration (ppb) |
|---------------|---------------------|
| Bi@CP         | 482.3               |
| Bi@CP/PFSA-10 | 58.0                |

153

154 **Table S5**

155 The EIS fitting results of different Bi catalysts at -0.7 V vs. Ag/AgCl in CO<sub>2</sub>-saturated  
156 atmosphere.

| Catalyst      | R <sub>s</sub> (Ω) | R <sub>ct</sub> (Ω) |
|---------------|--------------------|---------------------|
| Bi@CP         | 3.58               | 115.30              |
| Bi@CP/PTFE    | 3.57               | 170.40              |
| Bi@CP/PFSA-10 | 3.42               | 67.69               |

157

158 **Table S6**

159 Cathodic potentials of Bi@CP and Bi@CP/PFSA in KHCO<sub>3</sub> electrolytes with different  
160 concentrations.

| Catalyst      | Electrolyte             | Current density<br>(mA cm <sup>-2</sup> ) | Potential<br>(V vs. RHE) |
|---------------|-------------------------|-------------------------------------------|--------------------------|
| Bi@CP         | 0.1 M KHCO <sub>3</sub> | 250                                       | -0.79                    |
| Bi@CP/PFSA-10 |                         |                                           | -0.73                    |
| Bi@CP         | 0.5 M KHCO <sub>3</sub> |                                           | -0.75                    |
| Bi@CP/PFSA-10 |                         |                                           | -0.72                    |
| Bi@CP         | 1 M KHCO <sub>3</sub>   |                                           | -0.70                    |
| Bi@CP/PFSA-10 |                         |                                           | -0.68                    |
| Bi@CP         | 0.1 M KHCO <sub>3</sub> | 450                                       | -1.00                    |
| Bi@CP/PFSA-10 |                         |                                           | -0.93                    |
| Bi@CP         | 0.5 M KHCO <sub>3</sub> |                                           | -0.97                    |
| Bi@CP/PFSA-10 |                         |                                           | -0.92                    |
| Bi@CP         | 1 M KHCO <sub>3</sub>   |                                           | -0.88                    |
| Bi@CP/PFSA-10 |                         |                                           | -0.87                    |

161

162 **Table S7**

163 Cathodic potentials of Bi@CP and Bi@CP/PFSA in 0.5 M NaHCO<sub>3</sub>, KHCO<sub>3</sub> and  
 164 CsHCO<sub>3</sub> electrolytes.

| Catalyst      | Electrolyte              | Current density<br>(mA cm <sup>-2</sup> ) | Potential<br>(V vs. RHE) |
|---------------|--------------------------|-------------------------------------------|--------------------------|
| Bi@CP         | 0.5 M NaHCO <sub>3</sub> | 250                                       | -0.79                    |
| Bi@CP/PFSA-10 |                          |                                           | -0.75                    |
| Bi@CP         | 0.5 M KHCO <sub>3</sub>  |                                           | -0.75                    |
| Bi@CP/PFSA-10 |                          |                                           | -0.72                    |
| Bi@CP         | 0.5 M CsHCO <sub>3</sub> |                                           | -0.76                    |
| Bi@CP/PFSA-10 |                          |                                           | -0.72                    |
| Bi@CP         | 0.5 M NaHCO <sub>3</sub> | 450                                       | -1.01                    |
| Bi@CP/PFSA-10 |                          |                                           | -0.93                    |
| Bi@CP         | 0.5 M KHCO <sub>3</sub>  |                                           | -0.97                    |
| Bi@CP/PFSA-10 |                          |                                           | -0.92                    |
| Bi@CP         | 0.5 M CsHCO <sub>3</sub> |                                           | -0.99                    |
| Bi@CP/PFSA-10 |                          |                                           | -0.95                    |

165

## 166 **7 Reference**

- 167 1 D. Lei, Y. Ren, G. He, T. Ma, C. Liao, S. Bai, F. Wang, Y. Liu, L. Guo. *Small*, 2026, **22**, e12691.
- 168 2 L. Luo, Q. Gao, H. Wang, C. Liu, Y. Ji, X. Li, Q. Jiang, T. Zheng, C. Xia. *Nano Letters*, 2025, **25**,  
169 13918-13925.
- 170 3 Y. Chen, Y. Zhang, Z. Li, M. Liu, Q. Wu, T. W. B. Lo, Z. Hu, L. Y. S. Lee. *ACS Nano*, 2024, **18**,  
171 19345-19353.
- 172 4 C. Weng, C. Wang, Y. Song, Y.-X. Zhang, K. Zou, H. Chen, X. Yang, W. Lin. *Chemical*  
173 *Engineering Journal*, 2025, **505**, 159732.
- 174 5 C. Xu, Y. Wang, W. Li, D. Gao, G. Wang, R. Cai. *ACS Applied Materials & Interfaces*, 2024, **16**,  
175 39305-39311.
- 176 6 M. Wang, Y. Gu, J. Li, H. Wang, M. Zhu, J. Liang, Z. Tie, J. Ma, Z. Jin. *Nano Energy*, 2024, **126**,  
177 109659.
- 178 7 J. Jeon, H.-S. Bang, Y.-J. Ko, E. Huh, J. Kang, X. Zhang, S. Ka, Y. Kim, W. H. Lee, K. Kim, H. K.  
179 Yu, H.-S. Oh, J.-Y. Choi. *Chemical Engineering Journal*, 2025, **523**, 168350.
- 180 8 M. Usman, M. H. Suliman, M. Abdinejad, J. Kok, H. A. Naji, A. Helal, Z. H. Yamani, G. Centi.  
181 *Carbon Capture Science & Technology*, 2025, **16**, 100450.
- 182 9 J. Wu, J. Ge, S. Zhao, Y. Ji, Y. Li, S. Kim, Y. Choi, Y. Namgung, H. E. Lee, H. O. Seo, T. Li, W.  
183 Zhang, Z. Peng, Z. Liu, Y. D. Kim. *Chemical Engineering Journal*, 2026, **528**, 172328.
- 184 10 M. Zhang, W. Zhu, Z. Liu, S. Chen, D. Zhou, X. Mu, Z. Zhuang, S. Wang, J. Yang, Y. Du, X. Luo,  
185 Q. Zhang, S. Liu, D. Wang, Z. Dai. *Angewandte Chemie International Edition*, 2025, **64**, e202510206.  
186
